# Supplementary material for: Current Coverage of the mTOR Pathway by Next-Generation Sequencing Oncology Panels
Source: Int J Mol Sci. 2019 Feb 5;20(3):690. doi: 10.3390/ijms20030690 (PMC6387057; doi:10.3390/ijms20030690)
Supplement: Supplementary file 1 [file ijms-20-00690-s001.xlsx]

## Sheet: Tabelle1
NGS oncology panel genes
total genes:	305	150	143	127	67	56	50	49	48	64	31	26	25	24	21	15	8
mTOR relevant genes:	22	10	8	10	8	6	5	5	5	5	6	4	3	4	3	3	0
	Foundation One	Agilent ClearSeq Comprehensive Cancer Panel	Qiagen Human Cancer Predisposition GeneRead DNAseq Targeted Panel V2	Integrated DNA Technologies (IDT) xGen Pan-Cancer Panel	Archer VariantPlex Solid Tumor	Swift Biosciences Accel-Amplicon 56G Oncology Panel v2	NEBNext Direct Cancer HotSpot Panel	AmpliSeq Cancer Hotspot Panel v2	TruSeq Amplicon Cancer Panel	AmpliSeq for Illumina Focus Panel	Archer VariantPlex Comprehensive Thyroid and Lung Kit	TruSight Tumor 26	Agilent SureMASTR Tumor Hotspot	Qiagen Human Clinically Relevant Tumour GeneRead DNAseq Targeted Panel V2	Asuragen QuantideX NGS DNA Hotspot 21 Kit	TruSight Tumor 15	Qiagen Human Tumour Actionable Mutations GeneRead DNAseq Targeted Panel V2		mTOR pathway associated genes
	ABL1	ABL1	AIP	ACVR1B	ABL1	ABL1	ABL1	ABL1	ABL1	AKT1	AKT1	AKT1	AKT	AKT1	ABL1	AKT1	BRAF		4E-BP
	ACVR1B	AKT1	AKT1	ACVR2A	AKT1	AKT1	AKT1	AKT1	AKT1	ALK	ALK	ALK	ALK	ALK	ALK1	BRAF	EGFR		AKT1
	AKT1	ALK	ALK	AJUBA	ALK	ALK	ALK	ALK	ALK	AR	BRAF	APC	BRAF	AR	AKT1	EGFR	IDH1		AKT2
	AKT2	APC	ANTXR1	AKT1	APC	APC	APC	APC	APC	BRAF	CCND1	BRAF	CDKN2A	BRAF	AKT2	ERBB2	IDH2		AKT3
	AKT3	ASXL1	ANTXR3	APC	ATM	ATM	ATM	ATM	ATM	CCND1	CTNNB1	CDH1	CTNNB1	CTNNB1	BRAF	FOXL2	KIT		CCND1
	ALK	ATM	APC	AR	AURKA	BRAF	BRAF	BRAF	BRAF	CDK4	DDR2	CTNNB1	DDR2	DDR2	EGFR	GNA11	KRAS		Deptor
	ALOX12B	BRAF	ASCC1	ARHGAP35	BRAF	CDH1	CDH1	CDH1	CDH1	CDK6	EGFR	EGFR	EGFR	EGFR	ERBB2	GNAQ	NRAS		eIF3a
	AMER1	ABCB1	ATM	ARID1A	CCND1	CDKN2A	CDKN2A	CDKN2A	CDKN2A	CTNNB1	EIF1AX	ERBB2	ERBB2	ERBB2	FGFR1	KIT	PDGFRA		eIF3b
	APC	ABCC2	ATR	ARID5B	CCNE1	CSF1R	CSF1R	CSF1R	CSF1R	DDR2	ERBB2	FBXW7	ERBB4	FGFR3	FGFR3	KRAS			eIF3c
	AR	ABL2	AXIN2	ASXL1	CDH1	CTNNB1	CTNNB1	CTNNB1	CTNNB1	EGFR	FGFR1	FGFR2	FGFR2	GNA11	FLT3	MET			eIF3d
	ARAF	AKT2	BAP1	ATM	CDK4	DDR2	EGFR	EGFR	EGFR	ERBB2	FGFR2	FOXL2	FGFR3	GNAQ	HRAS	NRAS			eIF3e
	ARFRP1	AKT3	BARD1	ATR	CDKN2A	DNMT3A	ERBB2	ERBB2	ERBB2	ERBB4	FGFR3	GNAQ	H3F3A	IDH1	IDH1	PDGFRA			eIF3f
	ARID1A	ATRX	BLM	ATRX	CSF1R	EGFR	ERBB4	ERBB4	ERBB4	ESR1	GNAS	GNAS	HIST1H3B	IDH2	IDH2	PIK3CA			eIF3g
	ASXL1	CBL	BMPR1A	AXIN2	CTNNB1	ERBB2	EZH2	EZH2	FBXW7	FGFR1	HRAS	KIT	HRAS	KIT	JAK2	RET			eIF3h
	ATM	CDA	BRCA1	B4GALT3	DDR2	ERBB4	FBXW7	FBXW7	FGFR1	FGFR2	IDH1	KRAS	IDH1	KRAS	KIT	TP53			eIF3i
	ATR	CDH1	BRCA2	BAP1	EGFR	EZH2	FGFR1	FGFR1	FGFR2	FGFR3	IDH2	MAP2K1	IDH2	MAP2K1	KRAS				eIF3j
	ATRX	CDKN2B	BRIP1	BRAF	ERBB2	FBXW7	FGFR2	FGFR2	FGFR3	FGFR4	KIT	MET	KIT	MET	MET				eIF3k
	AURKA	CHD7	BUB1B	BRCA1	ERBB3	FGFR1	FGFR3	FLT3	FLT3	GNA11	KRAS	MSH6	KRAS	NRAS	NRAS				eIF3l
	AXIN1	CHIC2	CD96	BRCA2	ERBB4	FGFR2	FLT3	GNA11	GNA11	GNAQ	MAP2K1	NRAS	MEK	PDGFRA	PDGFRA				eIF3m
	AXL	CREBBP	CDC73	CBFB	ESR1	FGFR3	GNA11	GNAS	GNAQ	HRAS	MDM2	PDGFRA	MET	PIK3CA	PIK3CA				eIF4a
	BAP1	CRLF2	CDH1	CCND1	EZH2	FLT3	GNAQ	GNAQ	GNAS	IDH1	MET	PIK3CA	NRAS	PTEN	RET				eIF4b
	BARD1	CSF1R	CDK4	CDH1	FBXW7	FOXL2	GNAS	HNF1A	HNF1A	IDH2	NRAS	PTEN	PDGFRA	RET					eIF4E
	BCL2	BRCA1	CDKN1B	CDK12	FGFR1	GNA11	HNF1A	HRAS	HRAS	JAK1	PDGFRA	SMAD4	PIK3CA	STK11					eIF4g
	BCL2L1	BRCA2	CDKN2A	CDKN1A	FGFR2	GNAQ	HRAS	IDH1	IDH1	JAK2	PIK3CA	SRC	PTEN	TP53					eIF4h
	BCL2L2	CDKN2A	CHEK1	CDKN1B	FGFR3	GNAS	IDH1	IDH2	JAK2	JAK3	PTEN	STK11	STK11						FOXO
	BCL5	CEBPA	CHEK2	CDKN2A	FLT3	HNF1A	IDH2	JAK2	JAK3	KIT	RET	TP53							GBL/mLST8
	BCOR	CTNNB1	CYLD	CDKN2C	FOXL2	HRAS	JAK2	JAK3	KDR	KRAS	ROS1								GSK3A
	BCORL1	DNMT3A	CYP21A2	CEBPA	GNA11	IDH1	JAK3	KDR	KIT	MAP2K1	STK11								GSK3B
	BRAF	ERBB2	DDB2	CHEK2	GNAQ	IDH2	KDR	KIT	KRAS	MAP2K2	TERT								HIF1α
	BRCA1	CYP19A1	DICER1	CRIPAK	GNAS	JAK2	KIT	KRAS	MET	MET	TP53								LKB1
	BRCA2	CYP2A6	DIS3L2	CTCF	H3F3A	JAK3	KRAS	MET	MLH1	MTOR	TSHR								MDM2
	BRD4	CYP2B6	DKC1	CTNNB1	HNF1A	KDR	MET	MLH1	MPL	MYC									mSin1=MAPKAP1
	BRIP1	CYP2C19	EHBP1	DNMT3A	HRAS	KIT	MLH1	MPL	NOTCH1	MYCN									MTHFD2
	BTG1	CYP2C9	EPCAM	EGFR	IDH1	KRAS	MPL	NOTCH1	NPM1	NRAS									mTOR
	BTG2	CYP2D6	EPHB2	EGR3	IDH2	MAP2K1	NOTCH1	NPM1	NRAS	PDGFRA									NF1
	BTK	DDR1	ERCC2	EIF4A2	JAK2	MET	NPM1	NRAS	PDGFRA	PIK3CA									PDK1
	C11ORF30	DDR2	ERCC3	ELF3	JAK3	MLH1	NRAS	PDGFRA	PIK3CA	RAF1									PIK3CA
	CALR	DDX3X	ERCC4	EP300	KDR	MPL	PDGFRA	PIK3CA	PTEN	RET									PIK3CB
	CARD11	DPYD	ERCC5	EPHA3	KIT	MSH6	PIK3CA	PTEN	PTPN11	ROS1									PIK3CD
	CASP8	ERBB3	ERCC6	EPHB6	KRAS	NOTCH1	PTEN	PTPN11	RB1	SMO									PIK3CG
	CBFB	ERBB4	ESCO2	EPPK1	MAP2K1	NPM1	PTPN11	RB1	RET	RNA:									PIK3R1
	CBL	ERG	EXT1	ERBB4	MDM2	NRAS	RB1	RET	SMAD4	ABL1									PIK3R2
	CCND1	ESR2	EXT2	ERCC2	MET	PDGFRA	RET	SMAD4	SMARCB1	ALK									PIK3R3
	CCND2	EZH2	FAH	EZH2	MLH1	PIK3CA	SMAD4	SMARCB1	SMO	AKT3									PIK3R4
	CCND3	EGFR	FANCA	FBXW7	MPL	PTEN	SMARCB1	SMO	SRC	AXL									PIK3R5
	CCNE1	ESR1	FANCB	FGFR2	MYC	PTPN11	SMO	SRC	STK11	BRAF									PIK3R6
	CD22	FGFR2	FANCC	FGFR3	MYCN	RB1	SRC	STK11	TP53	EGFR									PIP3
	CD274	FLT3	FANCD2	FLT3	NOTCH1	RET	STK11	TP53	VHL	ERBB2									PKC alpha
	CD70	HRAS	FANCE	FOXA1	NPM1	STK11	TP53	VHL		ERG									PKC beta
	CD79A	IDH1	FANCF	FOXA2	NRAS	SMAD4	VHL			ETV1									PKC delta
	CD79B	IDH2	FANCG	GATA3	PDGFRA	SMARCB1				ETV4									PKC epsilon
	CDC73	FBXW7	FANCI	H3F3C	PIK3CA	SMO				ETV5									PKC eta
	CDH1	FGFR1	FANCL	HGF	PIK3R1	SRC				FGFR1									PKC gamma
	CDK12	FGFR3	FANCM	HIST1H1C	PTEN	TP53				FGFR2									PKC iota
	CDK4	FGFR4	FH	HIST1H2BD	PTPN11	TSC1				FGFR3									PKC theta
	CDK6	FLT1	FLCN	IDH1	RB1	VHL				MET									PKC zeta
	CDK8	FLT4	GALNT12	IDH2	RET					NTRK1									PRAS40=AKT1S1
	CDKN1A	FSTL5	GATA2	KDM5C	RHOA					NTRK2									Protor=PRR5
	CDKN1B	GNA11	GLI3	KDM6A	ROS1					NTRK3									PTEN
	CDKN2A	GNAQ	GLMN	KEAP1	SMAD4					PDGFRA									Raptor
	CDKN2B	GNAS	GPC3	KIT	SMARCB1					PPARG									REDD1=DDIT4
	CDKN2C	GSTP1	HFE	KRAS	SMO					RAF1									Rheb
	CEBPA	H3F3A	HRAS	LIFR	SRC					RET									Rictor
	CHEK1	HNF1A	KDR	LRRK2	STK11					ROS1									RRAGA
	CHEK2	IKZF1	KIF1B	MALAT1	TERT														RRAGB
	CIC	IL2RA	KIT	MAP2K4	TP53														RRAGC
	CREBBP	JAK2	KLHDC8B	MAP3K1	VHL														RRAGD
	CRKL	KRAS	LIG4	MAPK8IP1															S6K
	CSF1R	KIT	LYST	MECOM															SGK
	CSF3R	MAP2K2	MAX	MIR142															SREBP
	CTCF	MET	MC1R	KMT2B															TFEB
	CTNNA1	KMT2A	MEN1	KMT2C															TNFα
	CTNNB1	MPL	MET	KMT2D															TP53
	CUL3	IL2RB	MITF	MTOR															TSC1
	CUL4A	IL2RG	MLH1	NAV3															TSC2
	CXCR4	INPP4B	MLH3	NCOR1															ULK1
	CYP17A1	JAK1	MRE11A	NF1															VHL
	DAXX	JAK3	MSH2	NFE2L2															Wnt
	DDR1	KDM6A	MSH6	NFE2L3
	DDR2	KDR	MSMB	NOTCH1
	DIS3	LAMA2	MSR1	NPM1
	DNMT3A	LCK	MTAP	NRAS
	DOT1L	LTK	MUTYH	NSD1
	EED	MAP2K1	NBN	PBRM1
	EGFR	MAP2K4	NDUFA13	PCBP1
	EP300	MAP3K1	NF1	PDGFRA
	EPHA3	MAPK1	NF2	PHF6
	EPHB1	MED13	NTRK1	PIK3CA
	EPHB4	MYC	PALB2	PIK3CG
	ERBB2	MYD88	PALLD	PIK3R1
	ERBB3	NF1	PDE11A	POLQ
	ERBB4	NOTCH1	PDGFRA	PPP2R1A
	ERCC4	NPM1	PIK3CA	PRX
	ERG	MTOR	PMS2	PTEN
	ERRFI1	PDGFRA	POLD1	PTPN11
	ESR1	MLH1	POLE	RAD21
	EZH2	MST1R	POLH	RB1
	FAM46C	NELL2	POU6F2	RPL22
	FANCA	PDGFRB	PRKAR1A	RPL5
	FANCC	PHF6	PTCH1	RUNX1
	FANCL	PIK3R1	PTCH2	SETBP1
	FAS	PSMB1	PTEN	SETD2
	FBXW7	PSMB2	RAD50	SF3B1
	FGF10	PSMB5	RAD51B	SIN3A
	FGF12	PSMD1	RAD51C	SMAD2
	FGF14	PSMD2	RAD51D	SMAD4
	FGF19	RAF1	RB1	SMC1A
	FGF23	RARA	RECQL4	SMC3
	FGF3	RARB	RET	SOX17
	FGF4	RAFG	RHBDF2	SOX9
	FGF6	PIK3CA	RNASEL	SPOP
	FGFR1	PTCH1	RSPO1	STAG2
	FGFR2	PTEN	RTEL1	STK11
	FGFR3	PTPN11	RUNX1	TAF1
	FGFR4	NRAS	SBDS	TBL1XR1
	FH	RB1	SDHA	TBX3
	FLCN	RET	SDHAF2	TET2
	FLT1	ROS1	SDHB	TGFBR2
	FLT3	RPS6KB1	SDHC	TLR4
	FOXL2	RXRA	SDHD	TP53
	FUBP1	RXRB	SLX4	TSHZ2
	GABRA6	SHH	SMAD4	TSHZ3
	GATA3	SHOC2	SMARCA4	U2AF1
	GATA4	SLC22A1	SMARCB1	USP9X
	GATA6	SLC22A2	STK11	VEZF1
	GID4 (C17orf39)	SLC31A1	SUFU	VHL
	GNA11	SLC34A2	TERT	WT1
	GNA13	SLC45A3	TGFBR1
	GNAQ	SLC01B1	TINF2
	GNAS	SMAD4	TMC6
	GRM3	SMARCA4	TMC8
	GSK3B	RUNX1	TMEM127
	H3F3A	SMO	TP53
	HDAC1	STK11	TSC1
	HGF	TET2	TSC2
	HNF1A	TP53	UROD
	HRAS	VHL	VHL
	HSD3B1	WT1	WAS
	ID3	SMARCB1	WRN
	IDH1	SNCAIP	WT1
	IDH2	SOS1	XPA
	IGF1R	SPRED1	XPC
	IKBKE	SRC	XRCC3
	IKZF1	SUFU
	INPP4B	TAS2R38
	IRF2	TRRAP
	IRF4	TYK2
	IRS2	UGT1A1
	JAK1	YES1
	JAK2	ZMYM3
	JAK3
	JUN
	KDM5A
	KDM5C
	KDM6A
	KDR
	KEAP1
	KEL
	KIT
	KLHL6
	KMT2A
	KMT2D
	KRAS
	LTK
	LYN
	MAF
	MAP2K1
	MAP2K2
	MAP3K!
	MAPK1
	MCL1
	MDM2
	MDM4
	MED12
	MEF2B
	MEN1
	MERTK
	MET
	MITF
	MKNK1
	MLH1
	MPL
	MRE11A
	MSH2
	MSH3
	MSH6
	MST1R
	MTAP
	MTOR
	MUTYH
	MYC
	MYCL
	MYCN
	MYD88
	NBN
	NF1
	NF2
	NFE2L2
	NFKBIA
	NKX2-1
	NOTCH1
	NOTCH2
	NOTCH3
	NPM1
	NRAS
	NT5C2
	NTRK1
	NTRK2
	NTRK3
	P2RY8
	PALB2
	PARK2
	PARP1
	PARP2
	PARP3
	PAX5
	PBRM1
	PDCD1
	PDCD1LG2
	PDGFRA
	PDGFRB
	PDK1
	PIK3C2B
	PIK3C2G
	PIK3CA
	PIK3CB
	PIK3R1
	PIM1
	PMS2
	POLD1
	POLE
	PPARG
	PPP2R1A
	PPP2R2A
	PRDM1
	PRKAR1A
	PRKCI
	PTCH1
	PTEN
	PTPN11
	PTPRP
	QKI
	RAC1
	RAD21
	RAD51
	RAD51B
	RAD51C
	RAD51D
	RAD52
	RAD54L
	RAF1
	RARA
	RB1
	RBM10
	REL
	RET
	RICTOR
	RNF43
	ROS1
	RPTOR
	SDHA
	SDHB
	SDHC
	SDHD
	SETD2
	SF3B1
	SGK1
	SMAD2
	SMAD4
	SMARCA4
	SMARCB1
	SMO
	SNCAIP
	SOCS1
	SOX2
	SOX9
	SPEN
	SPOP
	SRC
	STAG2
	STAT3
	STK11
	SUFU
	SYK
	TBX3
	TEK
	TET2
	TGFBR2
	TIPARP
	TNFAIP3
	TNFRSR14
	TP53
	TSC1
	TSC2
	TYRO3
	U2AF1
	VEGFA
	VHL
	WHSC1
	WHSC1L1
	WT1
	XPO1
	XRCC2
	ZNF217
	ZNF703
